# Supplementary material for: Selenium-doped carbon materials: synthesis and applications for sustainable technologies
Source: Royal Society of Chemistry journal article supplement (doi:10.1039/d3gc04804g), 2024-01-01
Supplement: d3gc04804g1.pdf [file d3gc04804g1.pdf]

## Supplementary Material

### Selenium-doped carbon materials: Synthesis and applications for sustainable technologies

Table S1. The most common Se precursors utilized for carbon materials doping.

| Se precursor                                                                                                       | Reference                                                                                                             |
|--------------------------------------------------------------------------------------------------------------------|-----------------------------------------------------------------------------------------------------------------------|
| <b>Inorganic</b>                                                                                                   |                                                                                                                       |
| Se powder                                                                                                          | [36], [48], [53], [54], [56], [59], [64], [66], [67], [68], [71], [73], [79], [90], [106], [108], [123], [124], [136] |
| Selenium dioxide (SeO <sub>2</sub> )                                                                               | [46], [47], [51], [52], [60], [69], [70], [80], [81], [87], [125], [135]                                              |
| Sodium selenite (Na <sub>2</sub> SeO <sub>3</sub> )                                                                | [50], [72], [83]                                                                                                      |
| Potassium selenocyanate (KSeCN)                                                                                    | [62], [82]                                                                                                            |
| Selenium sulfide (SeS <sub>2</sub> )                                                                               | [57]                                                                                                                  |
| <b>Organic</b>                                                                                                     |                                                                                                                       |
| Diphenyl diselenide ((C <sub>6</sub> H <sub>5</sub> ) <sub>2</sub> Se <sub>2</sub> )                               | [37], [38], [40], [41], [49], [61], [63]                                                                              |
| Benzeneseleninic acid (C <sub>6</sub> H <sub>5</sub> SeO <sub>2</sub> H)                                           | [93], [126]                                                                                                           |
| Benzyl diselenide ((C <sub>6</sub> H <sub>5</sub> ) <sub>2</sub> (CH <sub>2</sub> ) <sub>2</sub> Se <sub>2</sub> ) | [58]                                                                                                                  |
| Selenourea ((NH <sub>2</sub> ) <sub>2</sub> CSe)                                                                   | [39]                                                                                                                  |
| 2-Formylselenophene (C <sub>5</sub> H <sub>4</sub> OSe)                                                            | [42]                                                                                                                  |
